# Supplementary material for: A Lagrangian analysis of the present-day sources of moisture for majorice-core sites
Source: Copernicus journal article supplement (doi:10.5194/esd-7-549-2016), 2016-07-08
Supplement: Supplementary file 2 [file esd-7-549-2016-supplement.pdf]

Supplement of Earth Syst. Dynam., 7, 549–558, 2016  
<http://www.earth-syst-dynam.net/7/549/2016/>  
doi:10.5194/esd-7-549-2016-supplement  
© Author(s) 2016. CC Attribution 3.0 License.

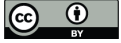

*Supplement of*

## **A Lagrangian analysis of the present-day sources of moisture for major ice-core sites**

**A. Drumond et al.**

*Correspondence to:* Anita Drumond ([anitadru@uvigo.es](mailto:anitadru@uvigo.es))

The copyright of individual parts of the supplement might differ from the CC-BY 3.0 licence.

1 **Supplementary Figure Captions:**

2

3 Figure S1: 1980-2012 vertically integrated moisture flux (vector, kg/m/s) and its respective  
4 divergence (shaded, mm/yr) in the Arctic (left-hand column), the Central (central column),  
5 and the Antarctic (right-hand column) domains for the MAM (top row), and SON (bottom  
6 row) temporal means. Data: Era-Interim

7

8 Figure S2: Moisture sources for the ice-core sites located in the Arctic (left-hand column),  
9 Central (central column), and Antarctic (right-hand column) domains for the MAM (top line),  
10 and SON (bottom line) temporal means. The contour lines represent the 95th percentile of the  
11 positive  $E-P$  values in the annual mean for each ice-core Lagrangian analysis. The asterisks  
12 indicate the location of the ice-core sites investigated, represented by different colours. The  
13 colours are for the Arctic domain: Logan (gray), Bona-Churchill (yellow), Windy Dome  
14 (orange), GISP-2 (blue), NEEM (brown), NGRIP (violet); for the Central domain: Huascarán  
15 (dark blue), Sajama (red), Grenzgletscher (green), Kilimanjaro (yellow), Everest (gray); for  
16 the Antarctic Domain: Byrd (purple), DML (clear blue), and Vostok (magenta).

17

18

19

20

21

22

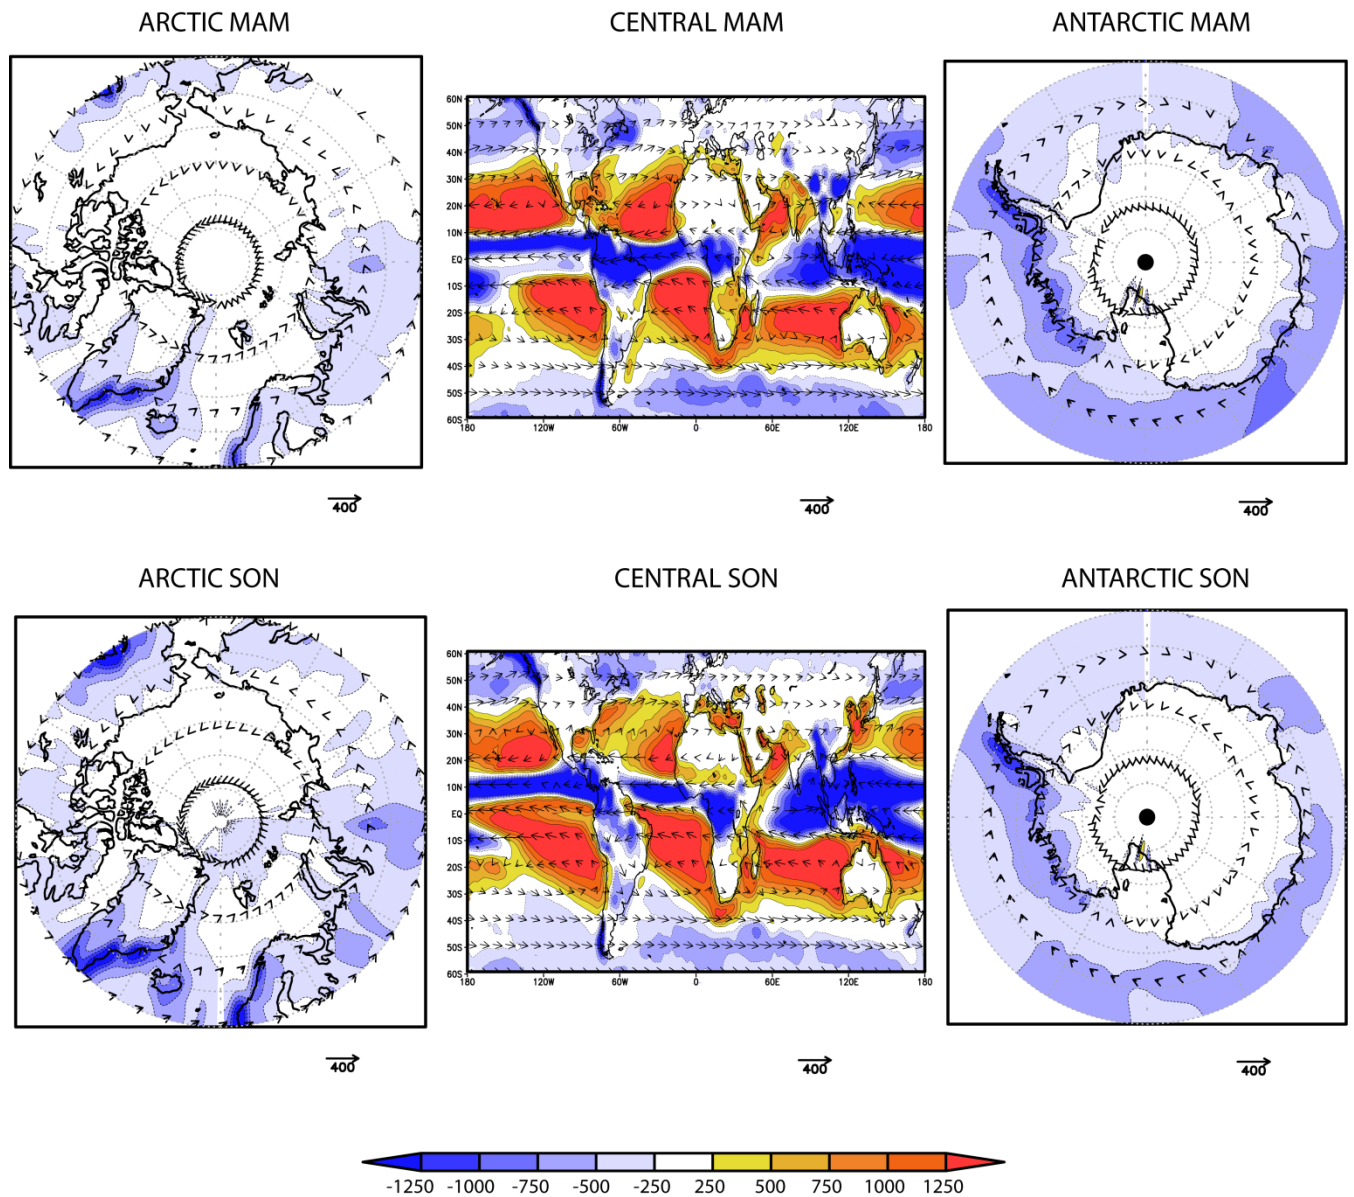

1

Figure S1

2

ARCTIC MAM

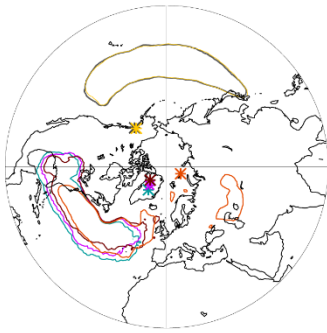

CENTRAL MAM

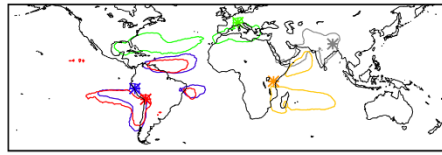

ANTARCTIC MAM

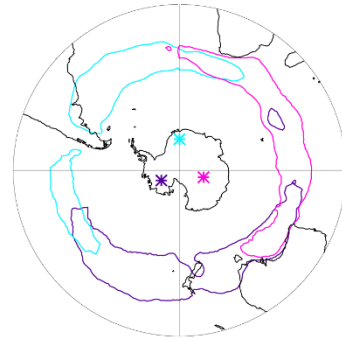

ARCTIC SON

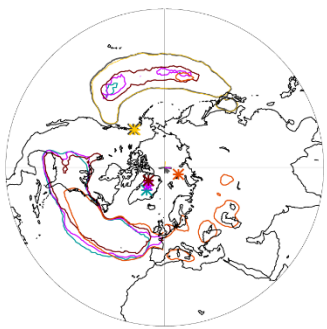

CENTRAL SON

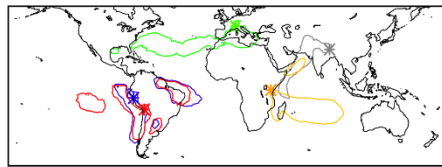

ANTARCTIC SON

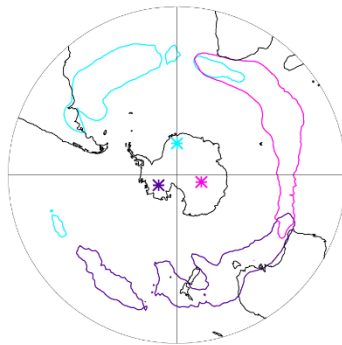

1

2

3

4

Figure S2
